# Supplementary material
Source: PubMed Central journal article supplement (PMC5710354)
Supplement: jamaotolaryngolheadnecksurg-143-1104-s001.pdf [file jamaotolaryngolheadnecksurg-143-1104-s001.pdf]

## Supplementary Online Content

Lisan Q, Moya-Plana A, Bonfils P. Association of Krouse classification for sinonasal inverted papilloma with recurrence: a systematic review and meta-analysis.  
*JAMA Otolaryngol Head Neck Surg*. Published online September 28, 2017.  
doi:10.1001/jamaoto.2017.1686

**eFigure 1.** Influence Analyses

**eFigure 2.** Extended Funnel Plots

This supplementary material has been provided by the authors to give readers additional information about their work.

**eFigure 1.** Influence Analyses

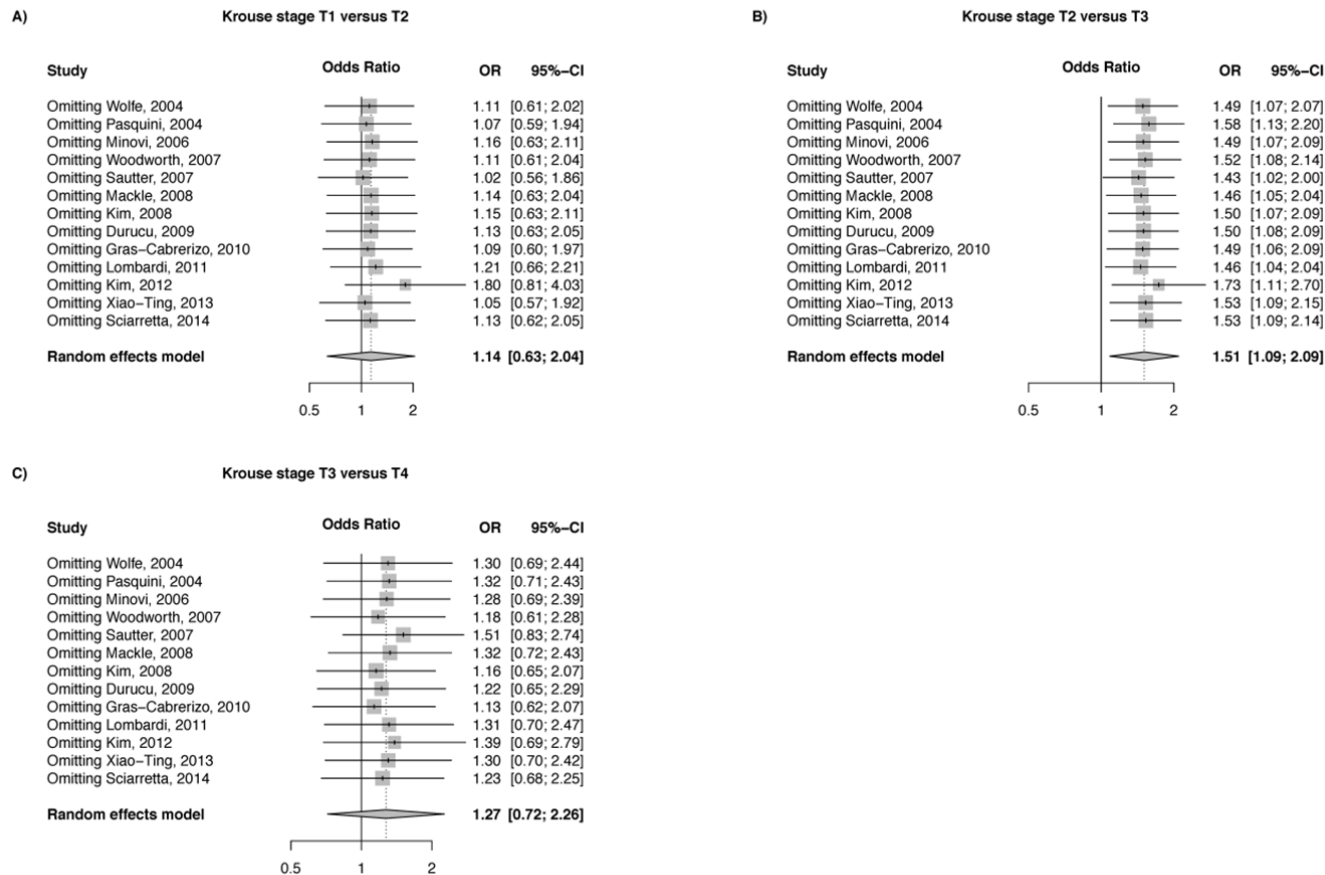

Note: (A) influence analysis in comparing stages T1 and T2, (B) stages T2 and T3, and (C) stages T3 and T4. Abbreviations: OR: odds ratio, CI: confidence interval.

**eFigure 2.** Extended Funnel Plots

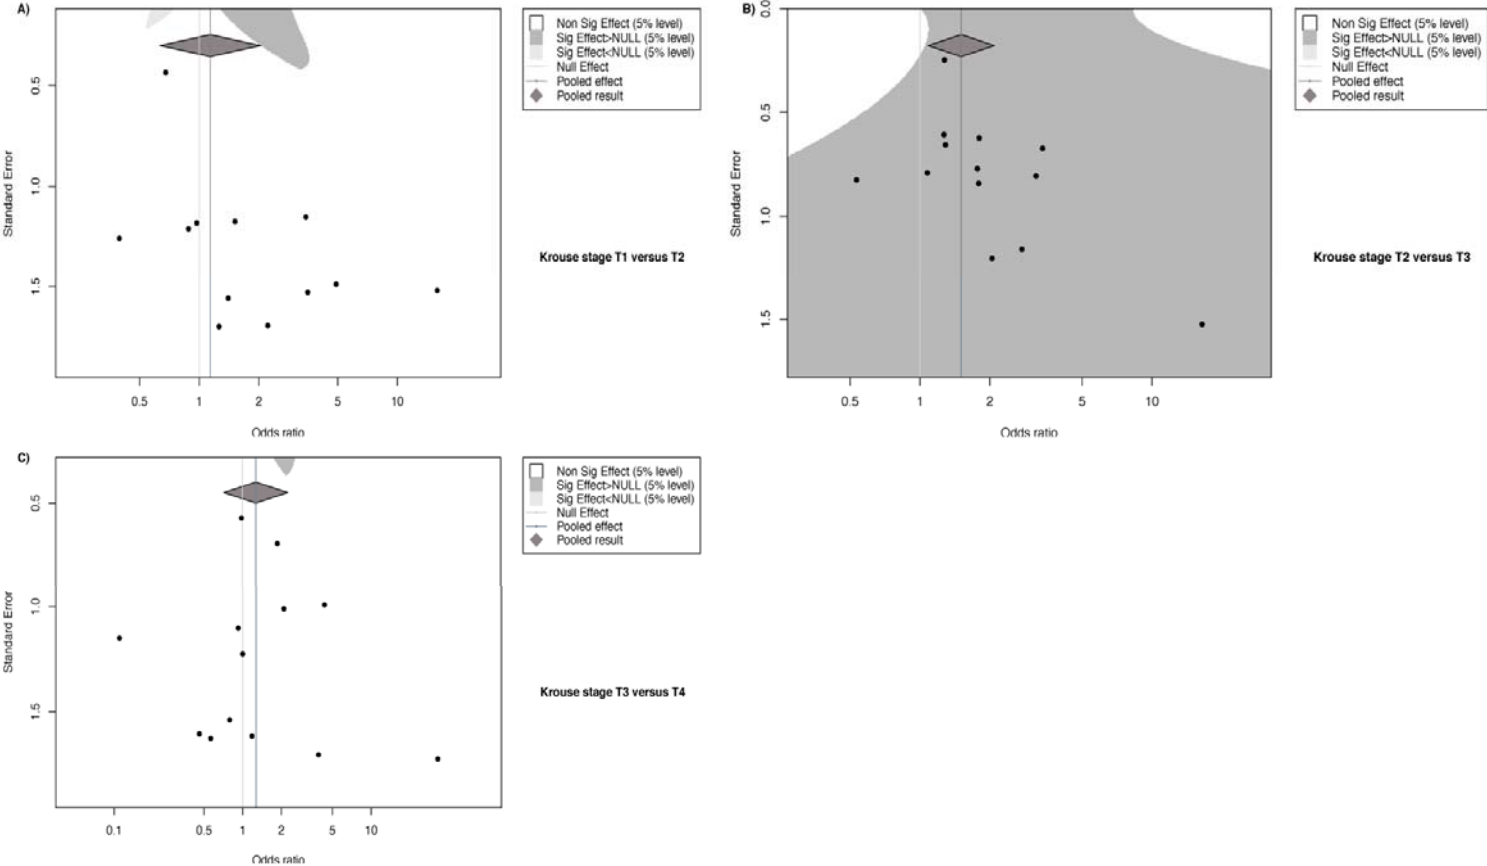

Note: Each point represents one study. The dark grey areas denote the space in which a study is in favor of a significant higher likelihood of recurrence for the highest Krouse’s stage when compared to the lowest one, whereas the light grey areas denote a significant lower likelihood of recurrence. White areas denote that studies showed no significant risk of recurrence. Extended funnel plots for the comparison of (A) stages T1 versus T2, (B) stages T2 versus T3, and (C) stages T3 versus T4.
